# Supplementary material for: Characterization of Haemophilus influenzae Strains with Non-Enzymatic Resistance to β-Lactam Antibiotics Caused by Mutations in the PBP3 Gene in the Czech Republic in 2010–2018
Source: MDPI journal article supplement (doi:10.3390/life11111260), 2021-11-18
Supplement: s1 [file s1]

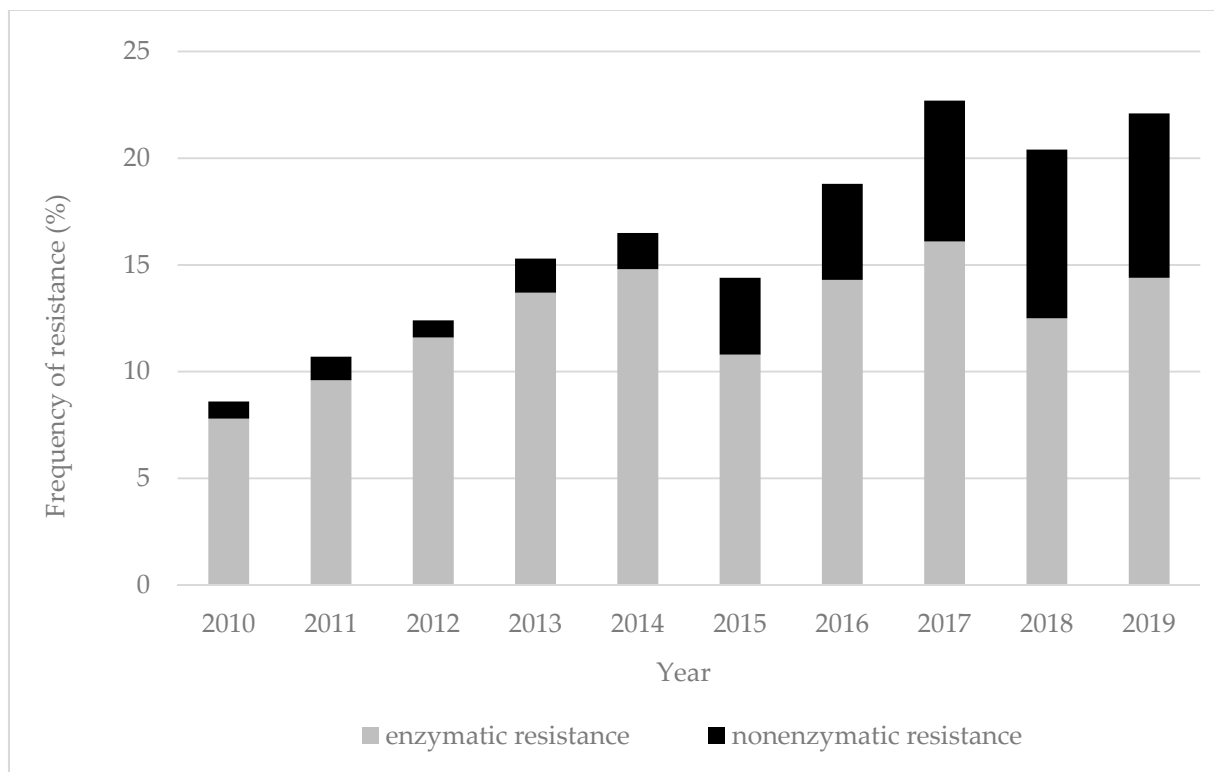

Figure S1. Trend of resistance to  $\beta$ -lactam antibiotics in *H. influenzae* in years 2010 - 2019 and proportion of enzymatic and non-enzymatic mechanism of resistance in the Czech Republic. The graph is based on the surveillance data on resistance to ampicillin and amoxicillin / clavulanic acid of *H. influenzae* causing respiratory tract infections (<http://www.szu.cz/respiracni-studie-atb-rezistence>). The data ([https://apps.szu.cz/rp/respiracni\\_patogeny.php](https://apps.szu.cz/rp/respiracni_patogeny.php)) are collected annually by the National reference laboratory for antibiotics, National Institute of Public Health, Prague, the Czech Republic.
